# Supplementary material for: Willingness, perceived barriers and motivators in adopting mobile applications for health-related interventions among older adults: a scoping review protocol
Source: PubMed Central journal article supplement — BMJ Open. 2020 Mar 16;10(3):e033870. doi: 10.1136/bmjopen-2019-033870 (PMC7076234; doi:10.1136/bmjopen-2019-033870), 2020-03-16
Supplement: bmjopen-2019-033870.reviewer_comments.pdf [file bmjopen-2019-033870.reviewer_comments.pdf]

## PEER REVIEW HISTORY

BMJ Open publishes all reviews undertaken for accepted manuscripts. Reviewers are asked to complete a checklist review form (<http://bmjopen.bmj.com/site/about/resources/checklist.pdf>) and are provided with free text boxes to elaborate on their assessment. These free text comments are reproduced below.

### ARTICLE DETAILS

|                            |                                                                                                                                                               |
|----------------------------|---------------------------------------------------------------------------------------------------------------------------------------------------------------|
| <b>TITLE (PROVISIONAL)</b> | Willingness, Perceived Barriers and Motivators in Adopting Mobile Applications for Health-Related Interventions among Older Adults: A Scoping Review Protocol |
| <b>AUTHORS</b>             | AHMAD, NURUL; Mat Ludin, Arimi Fitri; Shahar, Suzana; Mohd Noah, Shahrul; Mohd Tohit, Noorlaili                                                               |

### VERSION 1 – REVIEW

|                        |                                                                                                                 |
|------------------------|-----------------------------------------------------------------------------------------------------------------|
| <b>REVIEWER</b>        | Martine Puts<br>Lawrence S. Bloomberg Faculty of Nursing<br>University of Toronto<br>Toronto, Ontario<br>Canada |
| <b>REVIEW RETURNED</b> | 17-Oct-2019                                                                                                     |

|                         |                                                                                                                                                                                                                                                                                                                                                                                                                                                                                                                                                                                                                                                                                                                                                                                                                                                                                                                                                                                                                                                                                                                                                                                                                                                                                                                                                                                                   |
|-------------------------|---------------------------------------------------------------------------------------------------------------------------------------------------------------------------------------------------------------------------------------------------------------------------------------------------------------------------------------------------------------------------------------------------------------------------------------------------------------------------------------------------------------------------------------------------------------------------------------------------------------------------------------------------------------------------------------------------------------------------------------------------------------------------------------------------------------------------------------------------------------------------------------------------------------------------------------------------------------------------------------------------------------------------------------------------------------------------------------------------------------------------------------------------------------------------------------------------------------------------------------------------------------------------------------------------------------------------------------------------------------------------------------------------|
| <b>GENERAL COMMENTS</b> | <p>Thank you for allowing me to review your scoping review protocol. In general it is well written but I have a few questions/concerns.</p> <p>The authors have used the Prisma P statement for reporting but there is actually a Prisma Scoping review statement for reporting and that one should be used. Please change that in the review. In addition, in both reporting statements it is mentioned that the search should be appended and it has not been appended so please add.</p> <p>Furthermore both in the abstract and methods it is mentioned that the Arksey and O'Malley framework will be used and it is described as having 5 steps but it actually has 6 steps with the last step being consultation. So please clarify why this will not be done and include that in the limitation section.</p> <p>In the introduction only Malaysian stats are included but it would be good to include some more stats from various parts of the world.</p> <p>And in terms of the review it is mentioned mobile phones but do you mean smart phones ? or could it be SMS interventions on the mobile phone be eligible?</p> <p>Why in the search was the limit of the last 10 years applied?</p> <p>And for the search why will CINAHL not included as database as it is allied health literature?</p> <p>Please clarify if all the abstracts will be screened by one or 2 reviewers?</p> |
|-------------------------|---------------------------------------------------------------------------------------------------------------------------------------------------------------------------------------------------------------------------------------------------------------------------------------------------------------------------------------------------------------------------------------------------------------------------------------------------------------------------------------------------------------------------------------------------------------------------------------------------------------------------------------------------------------------------------------------------------------------------------------------------------------------------------------------------------------------------------------------------------------------------------------------------------------------------------------------------------------------------------------------------------------------------------------------------------------------------------------------------------------------------------------------------------------------------------------------------------------------------------------------------------------------------------------------------------------------------------------------------------------------------------------------------|

|  |                                                                                                                                |
|--|--------------------------------------------------------------------------------------------------------------------------------|
|  | You also may want to consider using Covidence software for your review instead of Excel as it will help facilitate the review. |
|--|--------------------------------------------------------------------------------------------------------------------------------|

|                        |                                                   |
|------------------------|---------------------------------------------------|
| <b>REVIEWER</b>        | Hanna Augustsson<br>Karolinska Institutet, Sweden |
| <b>REVIEW RETURNED</b> | 04-Nov-2019                                       |

|                         |                                                                                                                                                                                                                                                                                                                                                                                                                                                                                                                                                                                                                                                                                                                                                                                                                                                                                                                                                                                                                                                                                                                                                                                                                                                                                                                                                                                                                                                                                                                                                                                                                                                                                                                                                                                                                                                                                                                                                                                                                                                                                                                                                                                                                                                                                                                                                                                                                                                                                                                                                                                                                                                                                                                                                                                                                                                                                                                                                                                                                                                                                                                                                                                                                                                                |
|-------------------------|----------------------------------------------------------------------------------------------------------------------------------------------------------------------------------------------------------------------------------------------------------------------------------------------------------------------------------------------------------------------------------------------------------------------------------------------------------------------------------------------------------------------------------------------------------------------------------------------------------------------------------------------------------------------------------------------------------------------------------------------------------------------------------------------------------------------------------------------------------------------------------------------------------------------------------------------------------------------------------------------------------------------------------------------------------------------------------------------------------------------------------------------------------------------------------------------------------------------------------------------------------------------------------------------------------------------------------------------------------------------------------------------------------------------------------------------------------------------------------------------------------------------------------------------------------------------------------------------------------------------------------------------------------------------------------------------------------------------------------------------------------------------------------------------------------------------------------------------------------------------------------------------------------------------------------------------------------------------------------------------------------------------------------------------------------------------------------------------------------------------------------------------------------------------------------------------------------------------------------------------------------------------------------------------------------------------------------------------------------------------------------------------------------------------------------------------------------------------------------------------------------------------------------------------------------------------------------------------------------------------------------------------------------------------------------------------------------------------------------------------------------------------------------------------------------------------------------------------------------------------------------------------------------------------------------------------------------------------------------------------------------------------------------------------------------------------------------------------------------------------------------------------------------------------------------------------------------------------------------------------------------------|
| <b>GENERAL COMMENTS</b> | <p>The study protocol outlines a scoping review focusing on older adults' willingness to use mobile phones/applications to manage and monitor their own health and perceived barriers and facilitators for their use. This is an interesting and important topic. Below, I have made some suggestions for how the protocol and the review may be improved and raised some questions that need to be clarified.</p> <ol style="list-style-type: none"> <li>1. Page 7, line 6. Please add a reference for this section.</li> <li>2. In the background the authors focus mainly on mobile phone use etc. in Malaysia. If the focus of the review is international/global this should also be visible in the background text and the references used.</li> <li>3. Can you please put your scoping review in relation to other reviews conducted on the topic? The background should highlight what knowledge is missing and what the proposed review will add. This will clarify your contribution to the field.</li> <li>4. Your research questions all focus on the use of mobile applications to monitor health conditions. However, you later, e.g. on p 11, line 13, say that your overarching research question refer both to mobile phone usage to manage and monitor health conditions. Can you please clarify what the aims/research questions are and make sure that this is consistent all through the text.</li> <li>5. You may want to add the term "acceptability" to your perspective category of search terms as many eHealth studies use this term.</li> <li>6. Peer-reviewed primary research is one of the listed eligibility criteria but on p. 12 line 1-13 you state that you will search grey literature to identify studies, reports and conference abstracts of relevance to the review. Please clarify what type of publications that will be included in the review.</li> <li>7. The focus of the studies is lacking in the list of eligibility criteria, i.e. studies addressing older adults' perspectives with regard to willingness and perceived barriers/facilitators toward the use of mobile phones/applications to manage and monitor health.</li> <li>8. You may want to consider to test the inclusion and exclusion criteria to ensure consensus on included citations before independently assessing the articles, in addition to screening a sample of articles. This will help you to detect and resolve potential disagreements in advance.</li> <li>9. P.16, line 30. Clarify that is barriers and facilitators towards the use of mobile phones/applications to manage and monitor health conditions and not toward mobile phones in general.</li> <li>10. I believe that the protocol would benefit from a language check. The study protocol outlines a scoping review focusing on older adults' willingness to use mobile phones/applications to manage and monitor their own health and perceived barriers and facilitators for their use. This is an interesting and important topic. Below, I have made some suggestions for how the protocol and the review may be improved and raised some questions that need to be clarified.</li> </ol> <p>1. Page 7, line 6. Please add a reference for this section.</p> |
|-------------------------|----------------------------------------------------------------------------------------------------------------------------------------------------------------------------------------------------------------------------------------------------------------------------------------------------------------------------------------------------------------------------------------------------------------------------------------------------------------------------------------------------------------------------------------------------------------------------------------------------------------------------------------------------------------------------------------------------------------------------------------------------------------------------------------------------------------------------------------------------------------------------------------------------------------------------------------------------------------------------------------------------------------------------------------------------------------------------------------------------------------------------------------------------------------------------------------------------------------------------------------------------------------------------------------------------------------------------------------------------------------------------------------------------------------------------------------------------------------------------------------------------------------------------------------------------------------------------------------------------------------------------------------------------------------------------------------------------------------------------------------------------------------------------------------------------------------------------------------------------------------------------------------------------------------------------------------------------------------------------------------------------------------------------------------------------------------------------------------------------------------------------------------------------------------------------------------------------------------------------------------------------------------------------------------------------------------------------------------------------------------------------------------------------------------------------------------------------------------------------------------------------------------------------------------------------------------------------------------------------------------------------------------------------------------------------------------------------------------------------------------------------------------------------------------------------------------------------------------------------------------------------------------------------------------------------------------------------------------------------------------------------------------------------------------------------------------------------------------------------------------------------------------------------------------------------------------------------------------------------------------------------------------|

|  |                                                                                                                                                                                                                                                                                                                                                                                                                                                                                                                                                                                                                                                                                                                                                                                                                                                                                                                                                                                                                                                                                                                                                                                                                                                                                                                                                                                                                                                                                                                                                                                                                                                                                                                                                                                                                                                                                                                                                                                                                                                                                                                                                                                                                                                                                                                                                                                                                                                                                                                                                                                                                                                                                                                                                                                                                                                                                                                                                                                                                                                                                                                                                                                                                                                                                                                                                                                                                                                                                                                                                                                                     |
|--|-----------------------------------------------------------------------------------------------------------------------------------------------------------------------------------------------------------------------------------------------------------------------------------------------------------------------------------------------------------------------------------------------------------------------------------------------------------------------------------------------------------------------------------------------------------------------------------------------------------------------------------------------------------------------------------------------------------------------------------------------------------------------------------------------------------------------------------------------------------------------------------------------------------------------------------------------------------------------------------------------------------------------------------------------------------------------------------------------------------------------------------------------------------------------------------------------------------------------------------------------------------------------------------------------------------------------------------------------------------------------------------------------------------------------------------------------------------------------------------------------------------------------------------------------------------------------------------------------------------------------------------------------------------------------------------------------------------------------------------------------------------------------------------------------------------------------------------------------------------------------------------------------------------------------------------------------------------------------------------------------------------------------------------------------------------------------------------------------------------------------------------------------------------------------------------------------------------------------------------------------------------------------------------------------------------------------------------------------------------------------------------------------------------------------------------------------------------------------------------------------------------------------------------------------------------------------------------------------------------------------------------------------------------------------------------------------------------------------------------------------------------------------------------------------------------------------------------------------------------------------------------------------------------------------------------------------------------------------------------------------------------------------------------------------------------------------------------------------------------------------------------------------------------------------------------------------------------------------------------------------------------------------------------------------------------------------------------------------------------------------------------------------------------------------------------------------------------------------------------------------------------------------------------------------------------------------------------------------------|
|  | <p>2. In the background the authors focus mainly on mobile phone use etc. in Malaysia. If the focus of the review is international/global this should also be visible in the background text and the references used.</p> <p>3. Can you please put your scoping review in relation to other reviews conducted on the topic? The background should highlight what knowledge is missing and what the proposed review will add. This will clarify your contribution to the field.</p> <p>4. Your research questions all focus on the use of mobile applications to monitor health conditions. However, you later, e.g. on p 11, line 13, say that your overarching research question refer both to mobile phone usage to manage and monitor health conditions. Can you please clarify what the aims/research questions are and make sure that this is consistent all through the text.</p> <p>5. You may want to add the term "acceptability" to your perspective category of search terms as many eHealth studies use this term.</p> <p>6. Peer-reviewed primary research is one of the listed eligibility criteria but on p. 12 line 1-13 you state that you will search grey literature to identify studies, reports and conference abstracts of relevance to the review. Please clarify what type of publications that will be included in the review.</p> <p>7. The focus of the studies is lacking in the list of eligibility criteria, i.e. studies addressing older adults' perspectives with regard to willingness and perceived barriers/facilitators toward the use of mobile phones/applications to manage and monitor health.</p> <p>8. You may want to consider to test the inclusion and exclusion criteria to ensure consensus on included citations before independently assessing the articles, in addition to screening a sample of articles. This will help you to detect and resolve potential disagreements in advance.</p> <p>9. P.16, line 30. Clarify that is barriers and facilitators towards the use of mobile phones/applications to manage and monitor health conditions and not toward mobile phones in general.</p> <p>10. I believe that the protocol would benefit from a language check. The study protocol outlines a scoping review focusing on older adults' willingness to use mobile phones/applications to manage and monitor their own health and perceived barriers and facilitators for their use. This is an interesting and important topic. Below, I have made some suggestions for how the protocol and the review may be improved and raised some questions that need to be clarified.</p> <p>1. Page 7, line 6. Please add a reference for this section.</p> <p>2. In the background the authors focus mainly on mobile phone use etc. in Malaysia. If the focus of the review is international/global this should also be visible in the background text and the references used.</p> <p>3. Can you please put your scoping review in relation to other reviews conducted on the topic? The background should highlight what knowledge is missing and what the proposed review will add. This will clarify your contribution to the field.</p> <p>4. Your research questions all focus on the use of mobile applications to monitor health conditions. However, you later, e.g. on p 11, line 13, say that your overarching research question refer both to mobile phone usage to manage and monitor health conditions. Can you please clarify what the aims/research questions are and make sure that this is consistent all through the text.</p> |
|--|-----------------------------------------------------------------------------------------------------------------------------------------------------------------------------------------------------------------------------------------------------------------------------------------------------------------------------------------------------------------------------------------------------------------------------------------------------------------------------------------------------------------------------------------------------------------------------------------------------------------------------------------------------------------------------------------------------------------------------------------------------------------------------------------------------------------------------------------------------------------------------------------------------------------------------------------------------------------------------------------------------------------------------------------------------------------------------------------------------------------------------------------------------------------------------------------------------------------------------------------------------------------------------------------------------------------------------------------------------------------------------------------------------------------------------------------------------------------------------------------------------------------------------------------------------------------------------------------------------------------------------------------------------------------------------------------------------------------------------------------------------------------------------------------------------------------------------------------------------------------------------------------------------------------------------------------------------------------------------------------------------------------------------------------------------------------------------------------------------------------------------------------------------------------------------------------------------------------------------------------------------------------------------------------------------------------------------------------------------------------------------------------------------------------------------------------------------------------------------------------------------------------------------------------------------------------------------------------------------------------------------------------------------------------------------------------------------------------------------------------------------------------------------------------------------------------------------------------------------------------------------------------------------------------------------------------------------------------------------------------------------------------------------------------------------------------------------------------------------------------------------------------------------------------------------------------------------------------------------------------------------------------------------------------------------------------------------------------------------------------------------------------------------------------------------------------------------------------------------------------------------------------------------------------------------------------------------------------------------|

|  |                                                                                                                                                                                                                                                                                                                                                                                                                                                                                                                                                                                                                                                                                                                                                                                                                                                                                                                                                                                                                                                                                                                                                                                                                                                                                                                                      |
|--|--------------------------------------------------------------------------------------------------------------------------------------------------------------------------------------------------------------------------------------------------------------------------------------------------------------------------------------------------------------------------------------------------------------------------------------------------------------------------------------------------------------------------------------------------------------------------------------------------------------------------------------------------------------------------------------------------------------------------------------------------------------------------------------------------------------------------------------------------------------------------------------------------------------------------------------------------------------------------------------------------------------------------------------------------------------------------------------------------------------------------------------------------------------------------------------------------------------------------------------------------------------------------------------------------------------------------------------|
|  | <p>5. You may want to add the term "acceptability" to your perspective category of search terms as many eHealth studies use this term.</p> <p>6. Peer-reviewed primary research is one of the listed eligibility criteria but on p. 12 line 1-13 you state that you will search grey literature to identify studies, reports and conference abstracts of relevance to the review. Please clarify what type of publications that will be included in the review.</p> <p>7. The focus of the studies is lacking in the list of eligibility criteria, i.e. studies addressing older adults' perspectives with regard to willingness and perceived barriers/facilitators toward the use of mobile phones/applications to manage and monitor health.</p> <p>8. You may want to consider to test the inclusion and exclusion criteria to ensure consensus on included citations before independently assessing the articles, in addition to screening a sample of articles. This will help you to detect and resolve potential disagreements in advance.</p> <p>9. P.16, line 30. Clarify that is barriers and facilitators towards the use of mobile phones/applications to manage and monitor health conditions and not toward mobile phones in general.</p> <p>10. I believe that the protocol would benefit from a language check.</p> |
|--|--------------------------------------------------------------------------------------------------------------------------------------------------------------------------------------------------------------------------------------------------------------------------------------------------------------------------------------------------------------------------------------------------------------------------------------------------------------------------------------------------------------------------------------------------------------------------------------------------------------------------------------------------------------------------------------------------------------------------------------------------------------------------------------------------------------------------------------------------------------------------------------------------------------------------------------------------------------------------------------------------------------------------------------------------------------------------------------------------------------------------------------------------------------------------------------------------------------------------------------------------------------------------------------------------------------------------------------|

**VERSION 1 – AUTHOR RESPONSE**

| Reviewer 1 comments                                                                                                                                                                                                                                                                                                                      | Original page | Corrections                                                                                                                                                                                                                                                                                                                                                                                                                                                                                                                          | Page Number |
|------------------------------------------------------------------------------------------------------------------------------------------------------------------------------------------------------------------------------------------------------------------------------------------------------------------------------------------|---------------|--------------------------------------------------------------------------------------------------------------------------------------------------------------------------------------------------------------------------------------------------------------------------------------------------------------------------------------------------------------------------------------------------------------------------------------------------------------------------------------------------------------------------------------|-------------|
| The authors have used the Prisma P statement for reporting but there is actually a Prisma Scoping review statement for reporting and that one should be used. Please change that in the review. In addition, in both reporting statements it is mentioned that the search should be appended and it has not been appended so please add. | 10            | PRISMA-P checklist has been removed and we have completed the PRISMA-ScR checklist accordingly. The completed PRISMA-ScR checklist is now being attached as online supplementary 1.                                                                                                                                                                                                                                                                                                                                                  | 6           |
| Both in the abstract and methods it is mentioned that the Arksey and O'Malley framework will be used and it is described as having 5 steps but it actually has 6 steps with the last step being consultation. So please clarify why this will not be done and include that in the limitation section.                                    | 3 and 9       | <p>We have include step 6 (consultation with stakeholders) in the method section and edited the abstract section accordingly as follows:</p> <p><u>Abstract section:</u><br/>Finally, engagement with relevant stakeholders will be carried out to gain more insights into our data from different perspectives.</p> <p><u>Method section:</u><br/><u>Stage 6: Consultation with stakeholders</u><br/>This sixth stage of Arksey and O'Malley's framework (34) is an optional component in conducting scoping reviews. We aim to</p> | 2<br><br>11 |

|                                                                                                                                                           |                           |                                                                                                                                                                                                                                                                                                                                                                                                                                                                                                                                                                                                                                                                                                                                                                                                                                                                                            |                                |
|-----------------------------------------------------------------------------------------------------------------------------------------------------------|---------------------------|--------------------------------------------------------------------------------------------------------------------------------------------------------------------------------------------------------------------------------------------------------------------------------------------------------------------------------------------------------------------------------------------------------------------------------------------------------------------------------------------------------------------------------------------------------------------------------------------------------------------------------------------------------------------------------------------------------------------------------------------------------------------------------------------------------------------------------------------------------------------------------------------|--------------------------------|
|                                                                                                                                                           |                           | engage relevant stakeholders to gain more insights into our data from different perspectives. A detailed design of consultation process will be created after stage five of the methodology (collating, summarizing and reporting the results) has completed.                                                                                                                                                                                                                                                                                                                                                                                                                                                                                                                                                                                                                              |                                |
| In the introduction only Malaysian stats are included but it would be good to include some more stats from various parts of the world.                    | 6-9                       | <p>We have added some statistics and other studies from various part of the world to strengthen our points/view.</p> <p><u>In the introduction section:</u></p> <ul style="list-style-type: none"> <li>• Today, there are 703 million people aged 65 years or over in the world. This number is projected to double to 1.5 billion in 2050 with the proportion of one in six people in the world will be aged 65 years or over.</li> <li>• Although older adults may be seen as technological laggards, the internet usage among this subpopulation has been reported to increase from year to year (15). For instance, in the UK, the internet usage among older adults aged 65 to 74 group has increased gradually over the last eight years, with 52% in 2011 to 83% in 2019 (16). To add, the trend of smartphone ownership reported to grow rapidly across the globe (17).</li> </ul> | 4                              |
| And in terms of the review it is mentioned mobile phones but do you mean smart phones ? or could it be SMS interventions on the mobile phone be eligible? | Throughout the manuscript | <p>We have noticed this inconsistency and we have edited this part accordingly. This study will focuses on the mobile application on smartphone use to monitor and manage health among older adults.</p> <p><u>In the Introduction section:</u><br/>Therefore, this review aims to identify older adults' willingness, perceived barriers and motivators towards the use of mobile applications to monitor and manage their health.</p>                                                                                                                                                                                                                                                                                                                                                                                                                                                    | Throughout the manuscript<br>5 |
| Why in the search was the limit of the last 10 years applied?                                                                                             | 14                        | <p><u>In the method section:</u><br/>Studies that have been published from January 2009 to April 2019 were selected to be included in this study due to an immense growth reported in the number of mobile health applications download in the past 10 years with growth rate of more than 7% each year (38).</p>                                                                                                                                                                                                                                                                                                                                                                                                                                                                                                                                                                          | 10                             |

|                                                                                                                                |               |                                                                                                                                                                                                                                                                                                                                                                                                                                                                                                                                                                                                                                                                                                                                                                                                                                                                                                             |             |
|--------------------------------------------------------------------------------------------------------------------------------|---------------|-------------------------------------------------------------------------------------------------------------------------------------------------------------------------------------------------------------------------------------------------------------------------------------------------------------------------------------------------------------------------------------------------------------------------------------------------------------------------------------------------------------------------------------------------------------------------------------------------------------------------------------------------------------------------------------------------------------------------------------------------------------------------------------------------------------------------------------------------------------------------------------------------------------|-------------|
| And for the search why will CINAHL not included as database as it is allied health literature?                                 | 11            | <p>We may have overlooked this and included CINAHL as one of the electronic databases in the search strategy.</p> <p><u>In the method section:</u><br/> <u>Stage 2: Identifying relevant studies</u><br/> The following electronic databases have been selected: (1) PubMed; (2) Excerpta Medica Database (EMBASE); (3) Cumulative Index to Nursing and Allied Health Literature (CINAHL); (4) COCHRANE Library; (5) Google Scholar; and (6) ScienceDirect.</p>                                                                                                                                                                                                                                                                                                                                                                                                                                             | 7           |
| Please clarify if all the abstracts will be screened by one or 2 reviewers?                                                    | 15            | <p>We have decided to have two reviewers to run the screening procedure.</p> <p><u>In the method section:</u><br/> <u>Stage 3: Study Selection</u><br/> In the first stage, two reviewers will independently screen the titles and abstract of the articles where during this stage, the following decisions will be undertaken: (1) for any article that both reviewers agree to include, the article will proceed onto the second stage of screening process where the article will be read in full by each reviewer; (2) for any article that both reviewers agree to exclude, the article will not be read in full and excluded from the study; (3) for any article that did not achieved agreement between both reviewer ie. whether to include or exclude, the article will proceed onto the second stage of screening process to be read in full by each reviewer before final decision is made.</p> | 9           |
| You also may want to consider using Covidence software for your review instead of Excel as it will help facilitate the review. | 16            | <p>We appreciate the suggestion and we have decided to use Covidence software to organize and track data.</p> <p><u>In the method section:</u><br/> <u>Stage 4: Charting the data</u><br/> A combination of EndNote X9 and Covidence software will be used to organize and track relevant data.</p>                                                                                                                                                                                                                                                                                                                                                                                                                                                                                                                                                                                                         | 10          |
| Reviewer 2 comments                                                                                                            | Original page | Corrections                                                                                                                                                                                                                                                                                                                                                                                                                                                                                                                                                                                                                                                                                                                                                                                                                                                                                                 | Page Number |

|                                                                                                                                                                                                                                                |     |                                                                                                                                                                                                                                                                                                                                                                                                                                                                                                                                                                                                                                                                                                                                                                                                                                                                                                                                                                                                                                                                                                                                                                |     |
|------------------------------------------------------------------------------------------------------------------------------------------------------------------------------------------------------------------------------------------------|-----|----------------------------------------------------------------------------------------------------------------------------------------------------------------------------------------------------------------------------------------------------------------------------------------------------------------------------------------------------------------------------------------------------------------------------------------------------------------------------------------------------------------------------------------------------------------------------------------------------------------------------------------------------------------------------------------------------------------------------------------------------------------------------------------------------------------------------------------------------------------------------------------------------------------------------------------------------------------------------------------------------------------------------------------------------------------------------------------------------------------------------------------------------------------|-----|
| Page 7, line 6. Please add a reference for this section.                                                                                                                                                                                       | 7   | We've done a major reconstruction in the introduction section and the sentence has been removed.                                                                                                                                                                                                                                                                                                                                                                                                                                                                                                                                                                                                                                                                                                                                                                                                                                                                                                                                                                                                                                                               | 4-5 |
| In the background the authors focus mainly on mobile phone use etc. in Malaysia. If the focus of the review is international/global this should also be visible in the background text and the references used.                                | 6-9 | <p>We have added some statistics and studies from various part of the world to strengthen our study.</p> <p><u>In the introduction section:</u></p> <ul style="list-style-type: none"> <li>• The world's older population continues to grow at a rapid pace. Today, there were 703 million people aged 65 years or over in the world (1). This number is projected to double to 1.5 billion in 2050 with the proportion of one in six people in the world will be aged 65 years or over (1).</li> <li>• In the case of Malaysia's population, this subpopulation has increased gradually since the 1970s and expected to be tripled from 2.0 million today to more than 6.0 million by 2040 (2, 3).</li> <li>• Although older adults may be seen as technological laggards, the internet usage among this subpopulation has been reported to increase from year to year (15). For instance, in the UK, the internet usage among older adults aged 65 to 74 group has increased gradually over the last eight years, with 52% in 2011 to 83% in 2019 (16). To add, the trend of smartphone ownership reported to grow rapidly across the globe (17).</li> </ul> | 4   |
| Can you please put your scoping review in relation to other reviews conducted on the topic? The background should highlight what knowledge is missing and what the proposed review will add. This will clarify your contribution to the field. | 6-9 | <p>We have added relevant studies and highlight what knowledge is missing/limited in the last part of the introduction section.</p> <p><u>In the introduction section:</u></p> <p>The steady growth of older adult population combined with rising trend in technology uptake within this subpopulation suggest mHealth applications may represent a novel way to improve the health of older adults as well as to reduce healthcare cost. Despite the numerous benefits of mHealth applications (30-33), relatively little is known about whether older adults perceive that these apps confer such benefits. Their perspectives towards the use of mobile applications for health-related purposes have also been little studied. Therefore, this review aims to identify older adults' willingness, perceived barriers and motivators towards the use of mobile</p>                                                                                                                                                                                                                                                                                         | 5   |

|                                                                                                                                                                                                                                                                                                                                                                                            |    |                                                                                                                                                                                                                                                                                                                                                                                                                                                                                                                                                                                                                                                                                                                                                                                |                                    |
|--------------------------------------------------------------------------------------------------------------------------------------------------------------------------------------------------------------------------------------------------------------------------------------------------------------------------------------------------------------------------------------------|----|--------------------------------------------------------------------------------------------------------------------------------------------------------------------------------------------------------------------------------------------------------------------------------------------------------------------------------------------------------------------------------------------------------------------------------------------------------------------------------------------------------------------------------------------------------------------------------------------------------------------------------------------------------------------------------------------------------------------------------------------------------------------------------|------------------------------------|
|                                                                                                                                                                                                                                                                                                                                                                                            |    | applications to monitor and manage their health.                                                                                                                                                                                                                                                                                                                                                                                                                                                                                                                                                                                                                                                                                                                               |                                    |
| Your research questions all focus on the use of mobile applications to monitor health conditions. However, you later, e.g. on p 11, line 13, say that your overarching research question refer both to mobile phone usage to manage and monitor health conditions. Can you please clarify what the aims/research questions are and make sure that this is consistent all through the text. | 11 | We have noticed this inconsistency and we have edited this part accordingly. This study will focus on the mobile application use to monitor and manage health among older adults.<br><br><u>In the method section:</u><br><u>Stage 1: Identifying the research question.</u><br>We have identified one overarching research question to guide our systematic search strategy and reporting of results: 'What is known about the perspectives in adopting of mobile applications for health-related interventions among older adults?'                                                                                                                                                                                                                                          | Throughout the manuscript<br><br>6 |
| You may want to add the term "acceptability" to your perspective category of search terms as many eHealth studies use this term.                                                                                                                                                                                                                                                           | 13 | Thank you for the suggestion, we have now added the term "acceptability" to our perspective category in the search terms.<br><br><u>In the method section:</u><br><u>Stage 2: Identifying relevant studies</u><br>Search terms from key words, subject heading and synonyms such as mobile application*, mobile app*, mhealth, mobile health, mobile health, telehealth, mobile technolog*, older adult*, elder*, ageing population, older population, aging, geriatric, perspective, view, attitude, mindset, willingness, readiness, acceptability, barrier, limitation, difficulty, restriction, drawback, facilitate*, motivate*, promote*, help, ease, aid will be generated by the research team members in order to capture any potential resources from the databases. | 7 and 8                            |
| Peer-reviewed primary research is one of the listed eligibility criteria but on p. 12 line 1-13 you state that you will search grey literature to identify studies, reports and conference abstracts of relevance to the review. Please clarify what type of publications that will be included in the review.                                                                             | 12 | We have noticed this confusion and we have clarified what type of publications that will be included in the review.<br><br><u>In the method section:</u><br><u>Stage 2: Identifying relevant studies</u><br>The search strategy was collaboratively developed by our research team. Our literature search is open, including both peer-reviewed literature as well as grey literature ie. evidence not published in peer-reviewed publications and from the ten pages in the Google search engine.<br><br><u>Stage 3: Study Selection</u>                                                                                                                                                                                                                                      | 7                                  |



|                                                                                                                                                                                                                                                                                                 |    |                                                                                                                                                                                                                                                                                                                                                                                                                                                                                                                                                                                                                                                          |    |
|-------------------------------------------------------------------------------------------------------------------------------------------------------------------------------------------------------------------------------------------------------------------------------------------------|----|----------------------------------------------------------------------------------------------------------------------------------------------------------------------------------------------------------------------------------------------------------------------------------------------------------------------------------------------------------------------------------------------------------------------------------------------------------------------------------------------------------------------------------------------------------------------------------------------------------------------------------------------------------|----|
|                                                                                                                                                                                                                                                                                                 |    | <p><i>Eligibility criteria</i></p> <p>An article will be included when it:</p> <ul style="list-style-type: none"> <li>• is either a peer-reviewed literature or grey literature</li> </ul>                                                                                                                                                                                                                                                                                                                                                                                                                                                               | 9  |
| <p>The focus of the studies is lacking in the list of eligibility criteria, i.e. studies addressing older adults' perspectives with regard to willingness and perceived barriers/facilitators toward the use of mobile phones/applications to manage and monitor health.</p>                    | 14 | <p>We have edited this section accordingly as follows:</p> <p><u>In the method section:</u><br/><u>Stage 3: Study Selection</u></p> <p><i>Eligibility criteria</i></p> <p>An article will be included when it:</p> <ul style="list-style-type: none"> <li>• describes or reports older adults' perspectives either their willingness or barriers or motivators towards the use of mobile applications in monitoring and managing their health condition;</li> </ul>                                                                                                                                                                                      | 9  |
| <p>You may want to consider to test the inclusion and exclusion criteria to ensure consensus on included citations before independently assessing the articles, in addition to screening a sample of articles. This will help you to detect and resolve potential disagreements in advance.</p> | 15 | <p>We have edited this accordingly as follows:</p> <p><u>In the method section:</u><br/><u>Stage 2: Identifying relevant studies</u></p> <p>In order to determine the relevance of the citations and to resolve any potential disagreements, the research team will meet to refine the study inclusion and exclusion criteria prior to assessing the articles independently.</p>                                                                                                                                                                                                                                                                         | 7  |
| <p>P.16, line 30. Clarify that is barriers and facilitators towards the use of mobile phones/applications to manage and monitor health conditions and not toward mobile phones in general.</p>                                                                                                  | 16 | <p>We have noticed this inconsistency and we have edited this part accordingly. This study will focuses on the mobile application use to monitor and manage health among older adults.</p> <p><u>In the method section:</u><br/><u>Stage 4: Charting the data</u></p> <p>For each article, we are going to extract the following data; (1) characteristics of the study population, (2) settings, (3) characteristics of the mobile application used or tested, (4) type of outcome assessed (ie. older adults' perspectives; their willingness, barriers and motivators towards the use of mobile applications to monitor and manage their health).</p> | 10 |

|                                                                  |                           |                                                                      |                           |
|------------------------------------------------------------------|---------------------------|----------------------------------------------------------------------|---------------------------|
| I believe that the protocol would benefit from a language check. | Throughout the manuscript | We have performed language check with an English-speaking colleague. | Throughout the manuscript |
|------------------------------------------------------------------|---------------------------|----------------------------------------------------------------------|---------------------------|

**VERSION 2 – REVIEW**

|                        |                                                                                             |
|------------------------|---------------------------------------------------------------------------------------------|
| <b>REVIEWER</b>        | Martine Puts<br>Lawrence S. Bloomberg Faculty of Nursing<br>University of Toronto<br>Canada |
| <b>REVIEW RETURNED</b> | 16-Dec-2019                                                                                 |

|                         |                                                                                                                                                                                                                                                                                                                                                                                                                                                                                                                                                                                                                                                                                                                                                                                                                                                                                                                                                                                                                                                                                                                                                                                                                                                                                                                                                                                                                                                                                                                                                                                                                                                                                                                                                                                                                                                                                                                                                                                                                                                                                                                                                                                                           |
|-------------------------|-----------------------------------------------------------------------------------------------------------------------------------------------------------------------------------------------------------------------------------------------------------------------------------------------------------------------------------------------------------------------------------------------------------------------------------------------------------------------------------------------------------------------------------------------------------------------------------------------------------------------------------------------------------------------------------------------------------------------------------------------------------------------------------------------------------------------------------------------------------------------------------------------------------------------------------------------------------------------------------------------------------------------------------------------------------------------------------------------------------------------------------------------------------------------------------------------------------------------------------------------------------------------------------------------------------------------------------------------------------------------------------------------------------------------------------------------------------------------------------------------------------------------------------------------------------------------------------------------------------------------------------------------------------------------------------------------------------------------------------------------------------------------------------------------------------------------------------------------------------------------------------------------------------------------------------------------------------------------------------------------------------------------------------------------------------------------------------------------------------------------------------------------------------------------------------------------------------|
| <b>GENERAL COMMENTS</b> | <p>The scoping review protocol is well written but there are some things that need clarification.</p> <p>For the abstract instead of saying numerous databases please add which ones will be searched.</p> <p>Please add the review question(s) at the end of your introduction, it is not clear what they are.</p> <p>For the scoping review methods, the Arksey and O'Malley's framework is mentioned, but there are many advancements done to this framework so please review those.</p> <p>And I wonder as the apps are interventions, why use a scoping review methodology, why not use systematic review methodology?</p> <p>In the introduction page 5 line 38 you refer to there are many studies for older adults but no references are provided, please add.</p> <p>In the introduction it is mentioned you will examine barriers etc but how will you take into account effectiveness of the apps? If the app is not effective in reaching intended clinical outcome it is irrelevant what the barriers are?</p> <p>And for the apps as apps have been developed for many different diseases, such as mood disorders and cardiovascular monitoring, will you analyse by chronic condition? The barriers for self-monitoring maybe very different than an app to engage in games for mood or cognition.</p> <p>For the inclusion criteria is available in full text, this i think should be omitted as you only search papers published in the past 10 years so you should be able to get all .</p> <p>and for the inclusion criteria; is a peer-reviewed literature or grey literature; do you mean used a certain study design to evaluate the design? E.g. experimental design with control group? and how for grey literature will you decide that? peer reviewed literature is not a study design so please clarify and rewrite.</p> <p>for the data abstraction, there seems to be very little data collected to help determine the quality of the included study. The enhanced framework is advocating for quality assessments, please clarify if you will do a quality assessment for included studies.</p> <p>For the 6th step, please clarify what stakeholders you will consult?</p> |
|-------------------------|-----------------------------------------------------------------------------------------------------------------------------------------------------------------------------------------------------------------------------------------------------------------------------------------------------------------------------------------------------------------------------------------------------------------------------------------------------------------------------------------------------------------------------------------------------------------------------------------------------------------------------------------------------------------------------------------------------------------------------------------------------------------------------------------------------------------------------------------------------------------------------------------------------------------------------------------------------------------------------------------------------------------------------------------------------------------------------------------------------------------------------------------------------------------------------------------------------------------------------------------------------------------------------------------------------------------------------------------------------------------------------------------------------------------------------------------------------------------------------------------------------------------------------------------------------------------------------------------------------------------------------------------------------------------------------------------------------------------------------------------------------------------------------------------------------------------------------------------------------------------------------------------------------------------------------------------------------------------------------------------------------------------------------------------------------------------------------------------------------------------------------------------------------------------------------------------------------------|

|                        |                                                   |
|------------------------|---------------------------------------------------|
| <b>REVIEWER</b>        | Hanna Augustsson<br>Karolinska Institutet, Sweden |
| <b>REVIEW RETURNED</b> | 05-Jan-2020                                       |

|                         |                                                                                                              |
|-------------------------|--------------------------------------------------------------------------------------------------------------|
| <b>GENERAL COMMENTS</b> | I am happy with the authors amendments to the protocol and look forward to reading the final scoping review. |
|-------------------------|--------------------------------------------------------------------------------------------------------------|

### VERSION 2 – AUTHOR RESPONSE

| Items | Reviewer 1 comments                                                                               | Original page | Corrections                                                                                                                                                                                                                                                                                                                                                                                                                                                                                                                                                                                                                                                           | Page Number |
|-------|---------------------------------------------------------------------------------------------------|---------------|-----------------------------------------------------------------------------------------------------------------------------------------------------------------------------------------------------------------------------------------------------------------------------------------------------------------------------------------------------------------------------------------------------------------------------------------------------------------------------------------------------------------------------------------------------------------------------------------------------------------------------------------------------------------------|-------------|
| 1     | For the abstract, instead of saying numerous databases please add which ones will be searched.    | 2             | <p>We have edited this accordingly as follows:</p> <p>The search strategy will involve electronic databases including PubMed, EMBASE, CINAHL, COCHRANE Library, Google Scholar, and ScienceDirect, in addition to grey literature sources and hand-searching of reference lists.</p>                                                                                                                                                                                                                                                                                                                                                                                  | 2           |
| 2     | Please add the review question(s) at the end of your introduction, it is not clear what they are. | 5             | <p>We have edited this accordingly as follows:</p> <p>Therefore, this review aims to identify what is known about the perspectives in adopting mobile applications for health-related interventions among older adults. The specific research questions are:</p> <ol style="list-style-type: none"> <li>1. What is the level of willingness among older adults in using mobile applications to monitor and manage their health conditions?</li> <li>2. What are the existing barriers among older adults in using mobile applications to monitor and manage their health conditions?</li> <li>3. What motivates older adults to use mobile applications to</li> </ol> | 5           |

|   |                                                                                                                                                                  |                            |                                                                                                                                                                                                                                                                                                                                                                                                                                                                                                                                                                     |                            |
|---|------------------------------------------------------------------------------------------------------------------------------------------------------------------|----------------------------|---------------------------------------------------------------------------------------------------------------------------------------------------------------------------------------------------------------------------------------------------------------------------------------------------------------------------------------------------------------------------------------------------------------------------------------------------------------------------------------------------------------------------------------------------------------------|----------------------------|
|   |                                                                                                                                                                  |                            | monitor and manage their health conditions?                                                                                                                                                                                                                                                                                                                                                                                                                                                                                                                         |                            |
| 3 | For the scoping review methods, the Arksey and O'Malley's framework is mentioned, but there are many advancements done to this framework so please review those. | 6                          | We have reviewed this and add references accordingly:<br><br>This study will adopt Arksey and O'Malley's (35) framework for scoping reviews as the foundation and more recent advancements to the methodology (36, 37) as well as the updated framework by The Joanna Briggs Institute (38).                                                                                                                                                                                                                                                                        | 6                          |
| 4 | And I wonder as the apps are interventions, why use a scoping review methodology, why not use systematic review methodology?                                     | Through out the manuscript | We aim to gather backgrounds around older adults' perspectives towards the use of mobile applications to manage and monitor health condition. For your acknowledgement, this is our initial plan prior to developing our own mobile application to fit the purpose to manage and monitor health among older adults. We are planning to gather as much information as we could about their perspectives to help further guide us in developing the mobile app. Having said that, we are not anticipated to explore the effectiveness of such apps in the literature. | Through out the manuscript |
| 5 | In the introduction page 5 line 38 you refer to there are many studies for older adults but no references are provided, please add.                              | 5                          | We have already provide the reference for this.<br><br>Despite the numerous benefits of mHealth applications (30-33), relatively little is known about whether older adults perceive that these apps confer such benefits.                                                                                                                                                                                                                                                                                                                                          | 5                          |
| 6 | In the introduction it is mentioned you will examine                                                                                                             | 5                          | We aim to gather backgrounds around older adults' perspectives towards the                                                                                                                                                                                                                                                                                                                                                                                                                                                                                          | 5                          |

|   |                                                                                                                                                                                                                                                                                    |                            |                                                                                                                                                                                                                                                                                                                                                                                                                                                                                          |                            |
|---|------------------------------------------------------------------------------------------------------------------------------------------------------------------------------------------------------------------------------------------------------------------------------------|----------------------------|------------------------------------------------------------------------------------------------------------------------------------------------------------------------------------------------------------------------------------------------------------------------------------------------------------------------------------------------------------------------------------------------------------------------------------------------------------------------------------------|----------------------------|
|   | barriers etc but how will you take into account effectiveness of the apps? If the app is not effective in reaching intended clinical outcome it is irrelevant what the barriers are?                                                                                               |                            | use of mobile applications to manage and monitor health condition. For your acknowledgement, this is our initial plan prior to developing our own mobile application to fit the purpose to manage and monitor health among older adults. We are planning to gather as much information as we could about their perspectives to help further guide us in developing the mobile app. Having said that, we are not anticipated to explore the effectiveness of such apps in the literature. |                            |
| 7 | And for the apps as apps have been developed for many different diseases, such as mood disorders and cardiovascular monitoring, will you analyse by chronic condition? The barriers for self-monitoring maybe very different than an app to engage in games for mood or cognition. | Through out the manuscript | This is such a good insight. We will analyse and divide the results into (1) Apps that focus on chronic disease management and, (2) Apps that focus on prevention of chronic diseases ie. to promote good health.<br><br>We will produce a mobile app that will guide the elderly in diabetes management as well as promoting exercise for better cognition.                                                                                                                             | Through out the manuscript |
| 8 | For the inclusion criteria is available in full text, this i think should be omitted as you only search papers published in the past 10 years so you should be able to get all .                                                                                                   | 10                         | We have edited this accordingly as follows:<br><br><u>In the method section (Stage 3: Study Selection)</u><br><br>We have removed the forth bullet points (is available in full text;)                                                                                                                                                                                                                                                                                                   | 10                         |

|    |                                                                                                                                                                                                                                                                                                                                |    |                                                                                                                                                                                                                                                                                             |    |
|----|--------------------------------------------------------------------------------------------------------------------------------------------------------------------------------------------------------------------------------------------------------------------------------------------------------------------------------|----|---------------------------------------------------------------------------------------------------------------------------------------------------------------------------------------------------------------------------------------------------------------------------------------------|----|
|    |                                                                                                                                                                                                                                                                                                                                |    |                                                                                                                                                                                                                                                                                             |    |
| 9  | and for the inclusion criteria; is a peer-reviewed literature or grey literature; do you mean used a certain study design to evaluate the design? E.g. experimental design with control group? and how for grey literature will you decide that? peer reviewed literature is not a study design so please clarify and rewrite. | 10 | We will include all the peer reviewed literature for any study design. As this is a scoping review, we are not going to appraise individual study.                                                                                                                                          | 10 |
| 10 | for the data abstraction, there seems to be very little data collected to help determine the quality of the included study. The enhanced framework is advocating for quality assessments, please clarify if you will do a quality assessment for included studies.                                                             | 10 | We are not going to appraise and conduct quality assessment. This method is in accordance to one recent study publish in BMJ Open by Appoh L. et al. (Barriers to access of healthcare services by the immigrant population in Scandinavia: a scoping review protocol.)                     | 10 |
| 11 | For the 6th step, please clarify what stakeholders you will consult?                                                                                                                                                                                                                                                           | 11 | We have edited this as follows:<br><br>We aim to engage with relevant stakeholders such as geriatricians, family medicine doctors, mobile applications developers, dietitians, psychologists and/or clinical psychologists to gain more insights into our data from different perspectives. | 11 |

### VERSION 3 – REVIEW

|                         |                                                                                                                |
|-------------------------|----------------------------------------------------------------------------------------------------------------|
| <b>REVIEWER</b>         | Martine Puts PhD RN<br>Lawrence S. Bloomberg Faculty of Nursing<br>University of Toronto<br>Toronto, ON Canada |
| <b>REVIEW RETURNED</b>  | 16-Feb-2020                                                                                                    |
| <b>GENERAL COMMENTS</b> | All comments are addressed.                                                                                    |
