# Supplementary material for: Willingness, perceived barriers and motivators in adopting mobile applications for health-related interventions among older adults: a scoping review protocol
Source: PubMed Central journal article supplement — BMJ Open. 2020 Mar 16;10(3):e033870. doi: 10.1136/bmjopen-2019-033870 (PMC7076234; doi:10.1136/bmjopen-2019-033870), 2020-03-16
Supplement: bmjopen-2019-033870supp002.pdf [file bmjopen-2019-033870supp002.pdf]

**SUPPLEMENTARY FILE 2**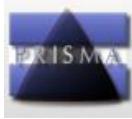**PRISMA 2009 Flow Diagram**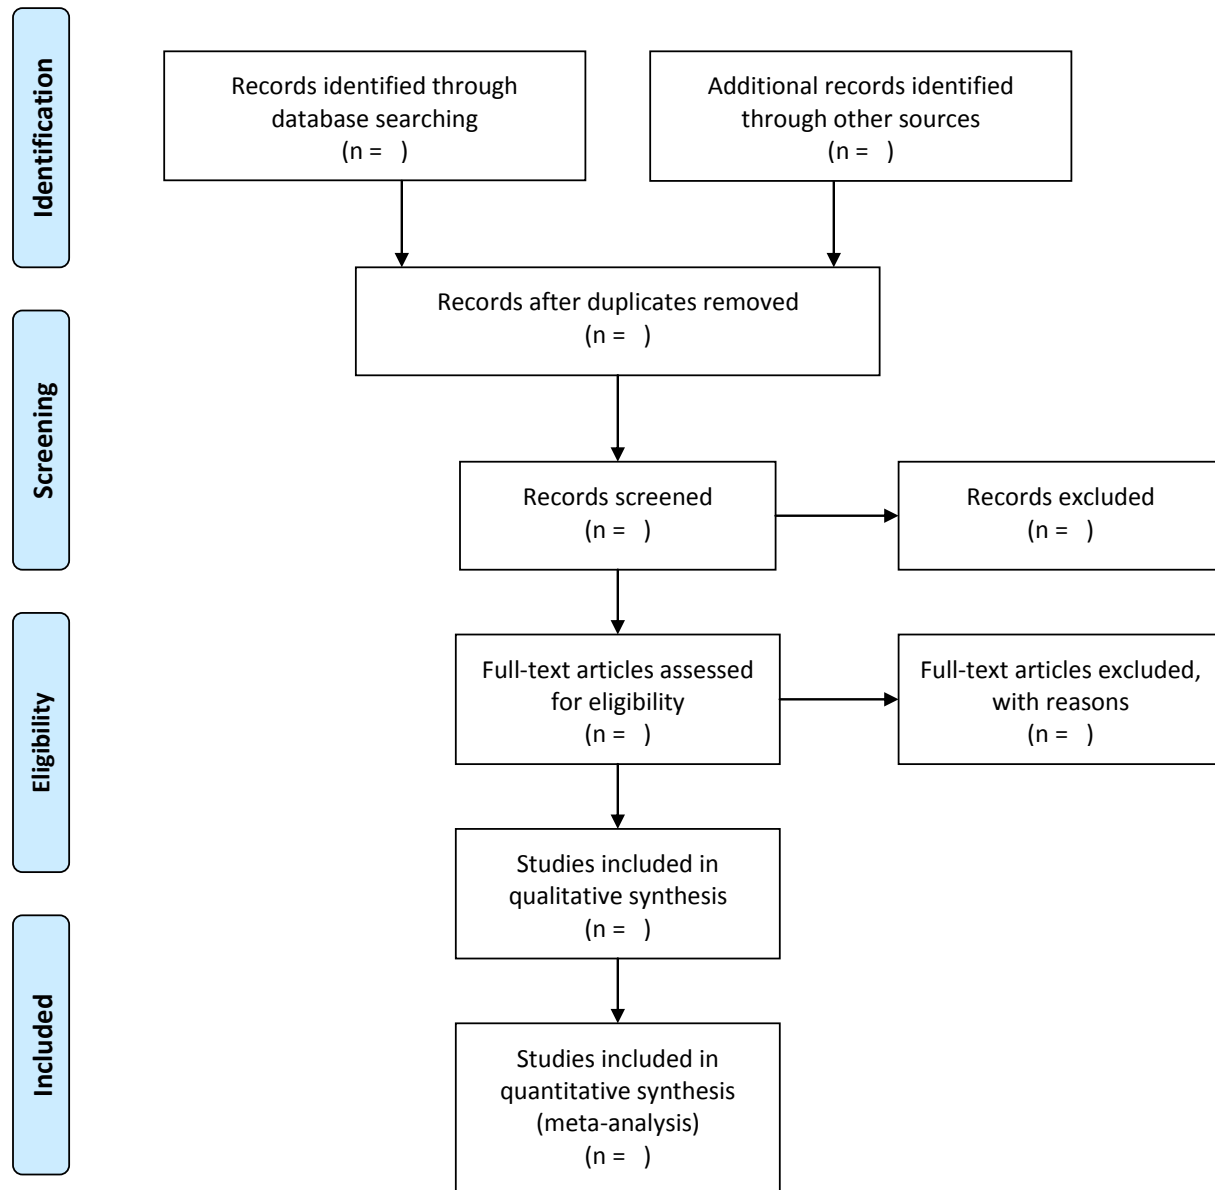

From: Moher D, Liberati A, Tetzlaff J, Altman DG, The PRISMA Group (2009). Preferred Reporting Items for Systematic Reviews and Meta-Analyses: The PRISMA Statement. PLoS Med 6(7): e1000097. doi:10.1371/journal.pmed1000097

For more information, visit [www.prisma-statement.org](http://www.prisma-statement.org).
